# Supplementary material for: Assessment of Mental Health Services Available Through Smartphone Apps
Source: PubMed Central journal article supplement (PMC9857226; doi:10.1001/jamanetworkopen.2022.48784), 2022-12-28

## Supplemental Online Content

Camacho E, Cohen A, Torous J. Assessment of mental health services available through smartphone apps. *JAMA Netw Open*. 2022;5(12):e2248784.  
doi:10.1001/jamanetworkopen.2022.48784

**eResults.** Change in Mental Health Apps After 180 Days Since Their Last Entry in MIND

**eFigure.** Comparison of Privacy Scores Between Android and iOS Applications

This supplemental material has been provided by the authors to give readers additional information about their work.

## **eResults.** Change in Mental Health Apps After 180 Days Since Their Last Entry in MIND

### **Longitudinal Change:**

#### **Days Since Last Update**

We gathered how many days it had been since the apps were last updated. Ten of the 578 apps have not been updated since development. The five-number summary for the number of days since each of the 568 apps were updated on the Apple app store or Google play store is Min: 12, Q1: 132, Med: 381, Q3: 972, Max: 3210.

#### **App Origin and Accessibility**

App cost structure changed in 76 apps (13%), with 13 of these app changes involving removal of a one-time purchase to download. 58 apps added an accessibility feature, 8 apps became available in Spanish, and 11 apps became available offline or without the use of internet.

#### **Privacy and Security**

The most common privacy-related change was increased privacy policy reading grade level, with 25 of the 443 apps with privacy policies identified with this change. However, 20 apps saw a decrease in privacy policy reading grade level. 22 apps removed their privacy policy altogether.

#### **Clinical Foundation**

The most frequently observed changes in clinical foundation were the addition of supporting studies (n=19), the addition of a use warning that the app is not a replacement for care (n=14), and the addition of potential for harm (n=8).

#### **Features and Engagement**

The most common feature additions were goal setting (n=15), psychoeducation (n=11), and symptom tracking (n=10). The leading engagement style additions included videos (n=14), asynchronous response (n=9), and peer support (n=8).

#### **Inputs and Outputs**

The primary changes in inputs involved the addition of microphone usage (n=41), logging in through a social network (n=16), and survey collection (n=15). The most common output additions were the ability to post from the app to your social media (n=31), reminders (n=17), and notifications (n=14).

#### **Interoperability**

Twelve apps added the ability to export user data and one app added the ability to integrate into an electronic medical record.

**eFigure.** Comparison of Privacy Scores Between Android and iOS Applications

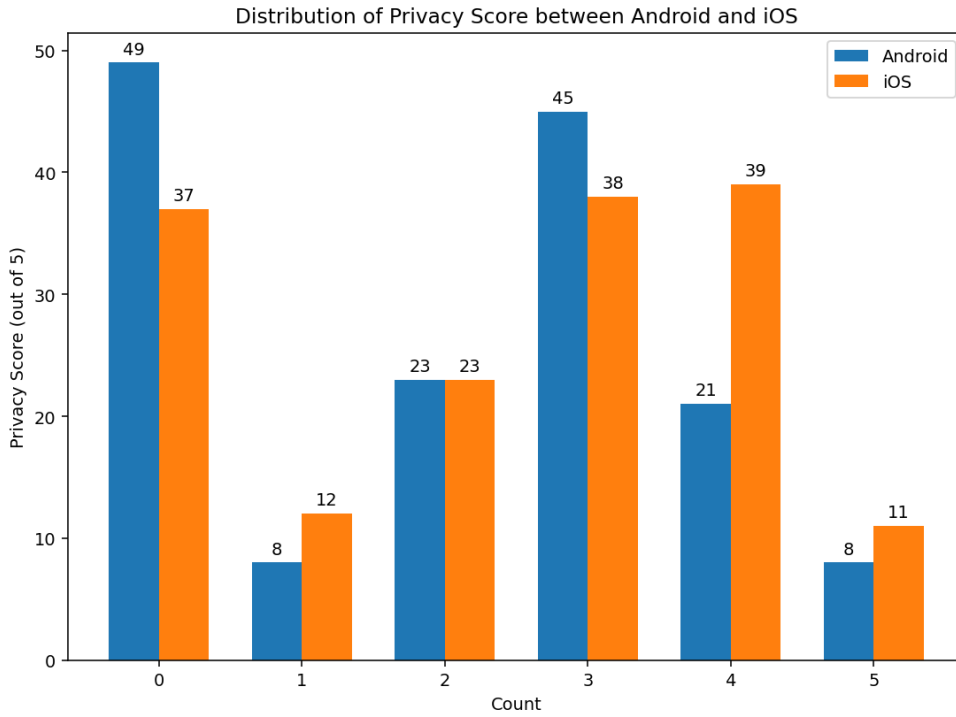

Supplement: jamanetwopen-e2248784-s001.pdf [file jamanetwopen-e2248784-s001.pdf]
