# Supplementary material for: Assessment of Mental Health Services Available Through Smartphone Apps
Source: PubMed Central journal article supplement (PMC9857226; doi:10.1001/jamanetworkopen.2022.48784), 2022-12-28
Supplement: jamanetwopen-e2248784-s002.pdf [file jamanetwopen-e2248784-s002.pdf]

## Data Sharing Statement

Camacho. Assessment of Mental Health Services Available Through Smartphone Apps. *JAMA Netw Open*. Published December 28, 2022. doi:10.1001/jamanetworkopen.2022.48784

### Data

**Data available:** Yes

**Data types:** Data (not involving human participants), Data dictionary

**How to access data:** <https://mindapps.org/Home>

**When available:** With publication

### Supporting Documents

**Document types:** None

### Additional Information

**Who can access the data:** <https://mindapps.org/Home> is accessible to all people at anytime

**Types of analyses:** The data presented is open to all uses.

**Mechanisms of data availability:** Without investigator support
